# Supplementary material for: Antioxidant and Anticancer Activities and Protein Interaction of the Oxidovanadium(IV) Naringin Complex
Source: MDPI journal article supplement (doi:10.3390/inorganics10010013), 2022-01-15
Supplement: s1 [file s1]

## **Supplementary Material**

### **Antioxidant and anticancer activities and protein interaction of the oxidovanadium(IV) naringin complex**

Andrés Gonzalo Restrepo-Guerrero<sup>1</sup>, Helen Goitia-Semenco<sup>1</sup>, Luciana G. Naso<sup>1</sup>, Marilin Rey<sup>2</sup>, Pablo J. Gonzalez<sup>2</sup>, Evelina G. Ferrer<sup>1</sup>, Patricia A.M. Williams<sup>1,\*</sup>.

<sup>1</sup>Centro de Química Inorgánica (CEQUINOR, UNLP, CONICET, asociado a CICPBA), Departamento de Química, Facultad de Ciencias Exactas, Universidad Nacional de La Plata, Bv. 120 N° 1465, CP 1900, La Plata, Buenos Aires, Argentina.

<sup>2</sup>Departamento de Física, Facultad de Bioquímica y Ciencias Biológicas, Universidad Nacional del Litoral and CONICET, S3000ZAA Santa Fe, Argentina.

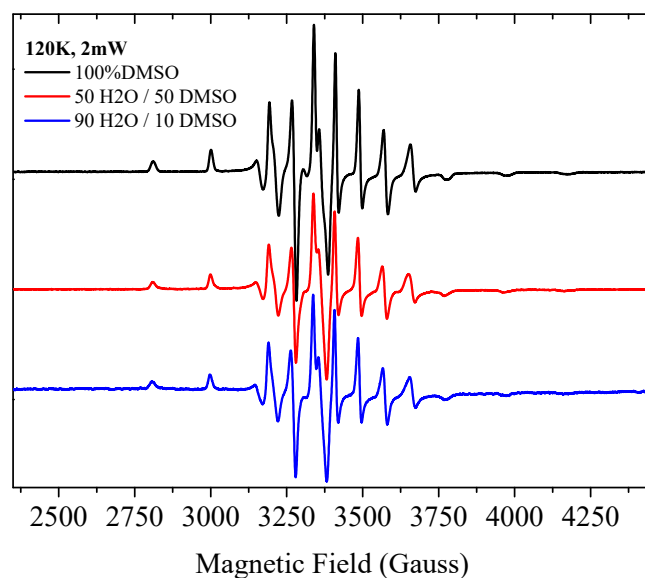

**Figure S1.** EPR spectrum of frozen solutions of VONarg at 120 K with different water:DMSO ratios.

Black: 100% DMSO, Red: 50% water pH 7, Blue: 90% water pH 7.

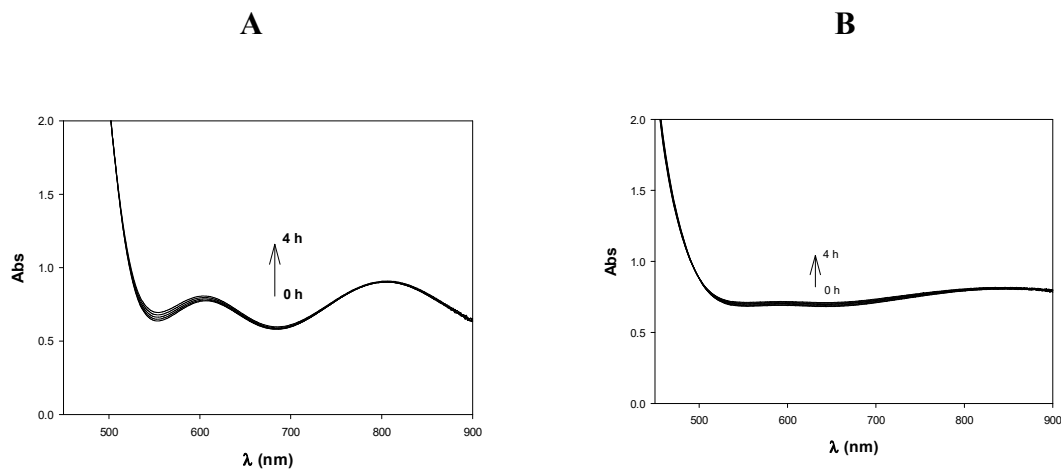

**Figure S2.** UV-Vis spectra recorded after 4h of 0.005 M solutions of [VO(Narg)<sub>2</sub>].8H<sub>2</sub>O in: A) DMSO;

B) DMSO/H<sub>2</sub>O 1/99.

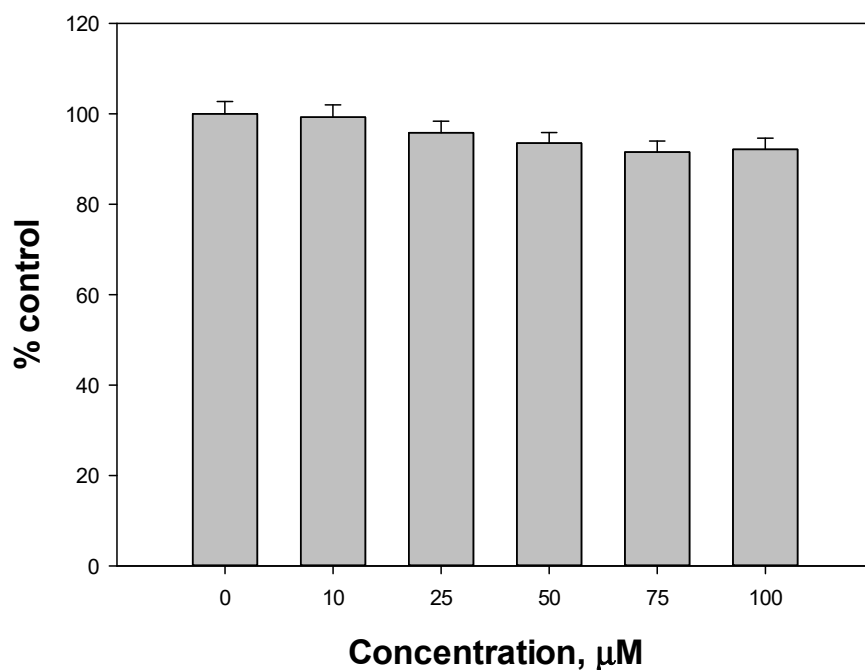

**Figure S3.** Cell viability assay at different VONarg concentrations after treatment for 24 h on HEK293 cells. The results are expressed as a percentage of the control level and represent the mean  $\pm$  the standard error of the mean (SEM) from three separate experiments.

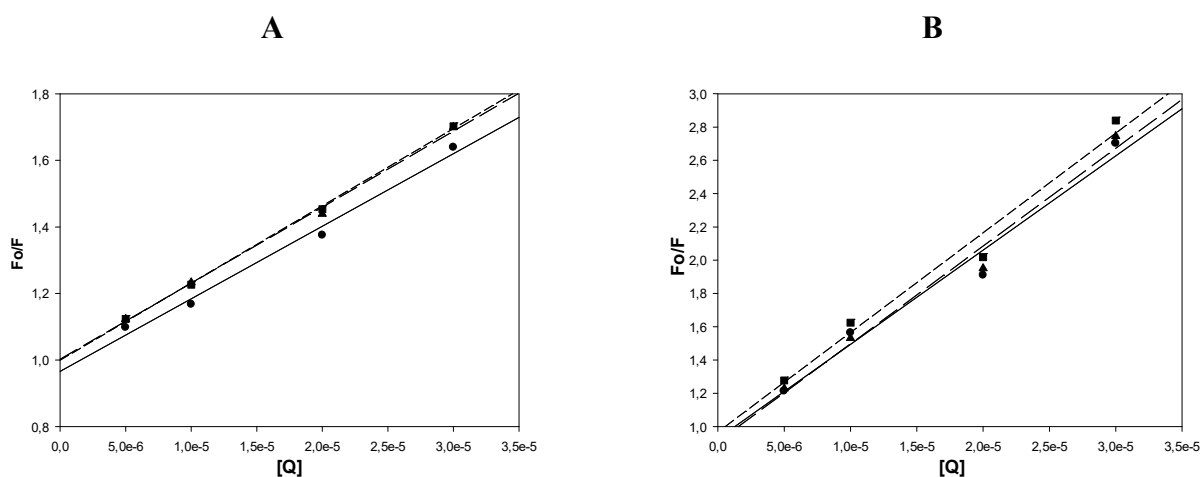

**Figure S4.** Stern-Volmer plot of the fluorescence quenching of BSA with different concentrations of naringin (A) and VONarg (B) systems, 5, 10, 20 and 30  $\mu\text{M}$ : ( $\bullet$ ) 298 K; ( $\blacktriangle$ ) 303 K; ( $\blacksquare$ ) 310 K, [BSA] = 6  $\mu\text{M}$ ,  $\lambda_{\text{ex}}$  = 280 nm.
